# Supplementary material for: Hairpin ribozyme-antisense RNA constructs can act as molecular lassos
Source: PubMed Central journal article supplement — Nucleic Acids Res. 2008 Oct 25;36(21):6752–66. doi: 10.1093/nar/gkn637 (PMC2588507; doi:10.1093/nar/gkn637), 2008-10-25
Supplement: gkn637_2.pdf [file gkn637_2.pdf]

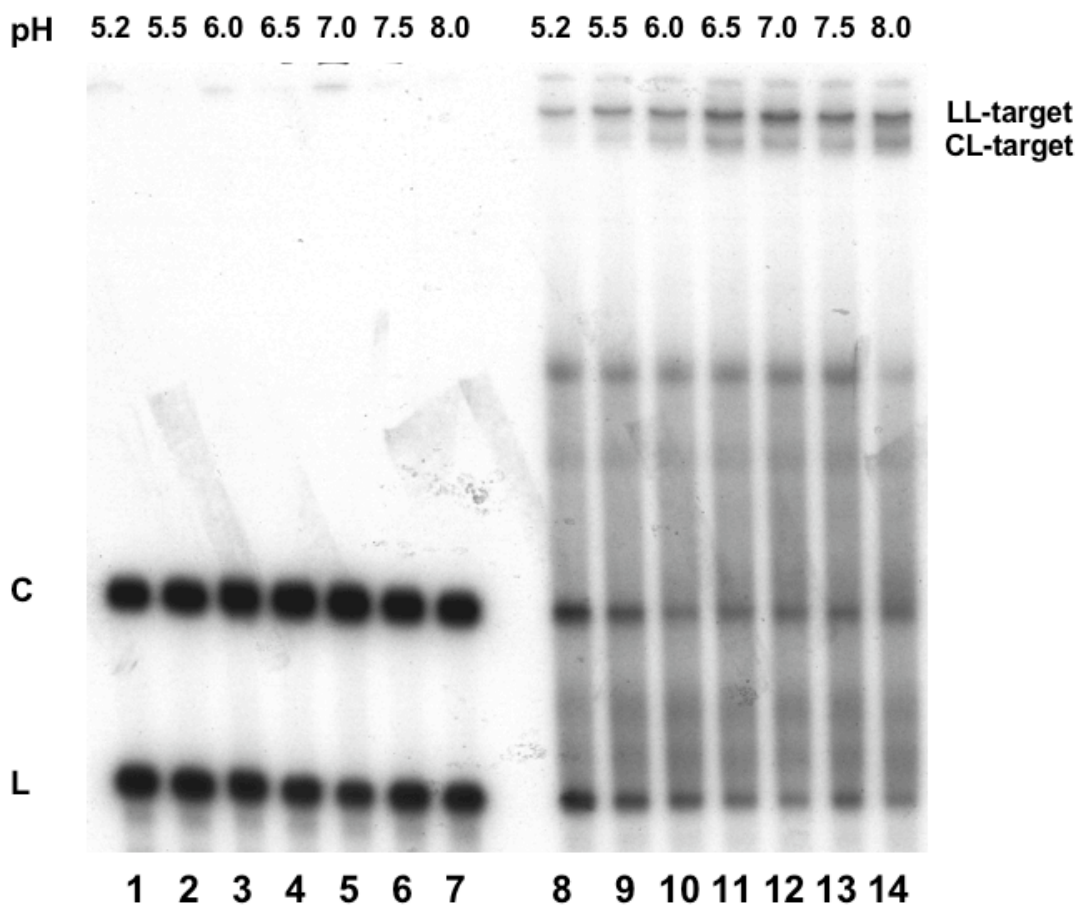

**Supplementary Figure 2.** pH-dependence of features of Lasso ATR1, capable of triplex formation with its TNF709 RNA target. Lanes 1–6 show internally  $^{32}\text{P}$ -labeled, gel-purified linear (LL) and circular (CL) Lasso forms that undergo interconversion through self-ligation and self-cleavage, respectively, after incubation in 50 mM buffer (at the pH indicated) and 10 mM  $\text{MgCl}_2$  for 1 hr at 37°C. Lanes 8–14 are the same as 1–6 with excess (1.5  $\mu\text{M}$ ) non-radioactive TNF709 target RNA added. Universal buffer solutions (Dean, 1985) containing appropriate sodium acetate-borate-phosphate mixtures were used to provide the indicated pH values. The products were analyzed on denaturing 6% polyacrylamide gels (8 M urea).

Dean, J.A., ed. 1985. *Lange's handbook of Chemistry*, 13<sup>th</sup> edition. McGraw-Hill, New York.
