# Supplementary material for: Hairpin ribozyme-antisense RNA constructs can act as molecular lassos
Source: PubMed Central journal article supplement — Nucleic Acids Res. 2008 Oct 25;36(21):6752–66. doi: 10.1093/nar/gkn637 (PMC2588507; doi:10.1093/nar/gkn637), 2008-10-25
Supplement: gkn637_3.pdf [file gkn637_3.pdf]

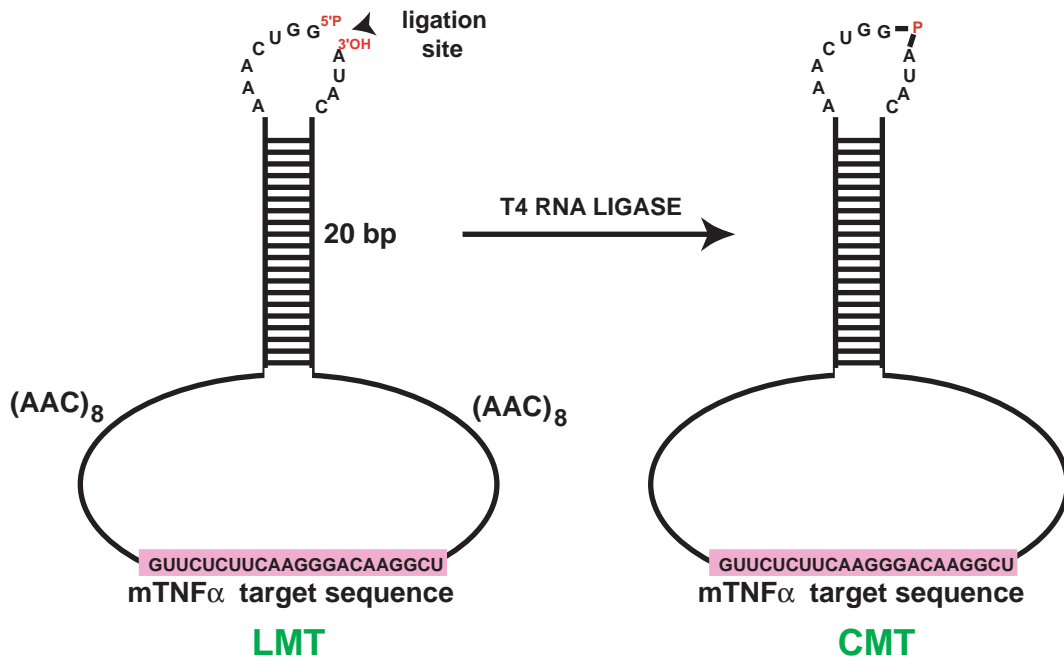

**Supplementary Figure 3. Structure of model circular RNA target.** The circular target (CMT) was prepared from its linear form (LMT) by intramolecular ligation using RNA ligase. The 120-nt long CMT contains a TNF sequence (22 nt) that is fully complementary to the antisense sequence of Lasso ALR562-2. The TNF sequence is flanked by two (AAC)<sub>8</sub> linkers, which do not form secondary structures within CMT, and a hairpin-forming element that facilitates ligation of the RNA ends by RNA ligase. For sequence details, see Materials and Methods.
