# Supplementary material for: Hairpin ribozyme-antisense RNA constructs can act as molecular lassos
Source: PubMed Central journal article supplement — Nucleic Acids Res. 2008 Oct 25;36(21):6752–66. doi: 10.1093/nar/gkn637 (PMC2588507; doi:10.1093/nar/gkn637), 2008-10-25
Supplement: gkn637_4.pdf [file gkn637_4.pdf]

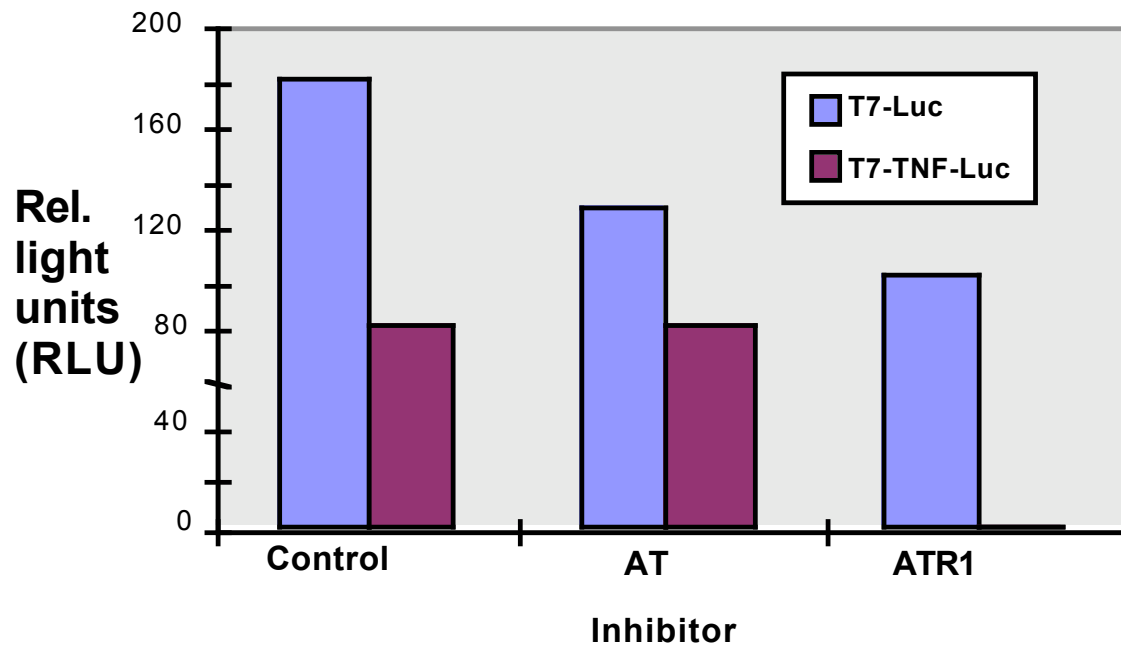

**Supplementary Figure 4. Inhibition of translation *in vitro* by ATR1.** Relative luminescence reflecting amounts of luciferase translated *in vitro* from T7-TNF-Luc or T7-Luc mRNAs before and after treatment either by Lasso ATR1 (right panel), or antisense RNA AT (derived from ATR1 by deleting the HPR domain; middle panel). T7-TNF-Luc is mRNA transcribed from the construct TNF22-Luc shown in **Fig. 6a**. The negative control target T7-Luc is the same as TNF-luc but lacks the TNF sequence targeted by ATR1 and AT. Before the translation assays, these mRNAs (0.8  $\mu$ g of each) were either pre-incubated alone (left control panel) or pre-hybridized with a 30-fold molar excess of either ATR1 or AT for 1 h at 37°C in 10 mM Mg(OAc)<sub>2</sub>, 50 mM Tris-acetate (pH 7.5). Aliquots from these mixtures were incubated for 1.5 h with FLEXI rabbit reticulocyte lysate translation system components (Promega). The products of translation were mixed with luciferin reagent (Promega) and luminescence was measured on a luminometer.
