# Supplementary material for: Hairpin ribozyme-antisense RNA constructs can act as molecular lassos
Source: PubMed Central journal article supplement — Nucleic Acids Res. 2008 Oct 25;36(21):6752–66. doi: 10.1093/nar/gkn637 (PMC2588507; doi:10.1093/nar/gkn637), 2008-10-25
Supplement: gkn637_5.pdf [file gkn637_5.pdf]

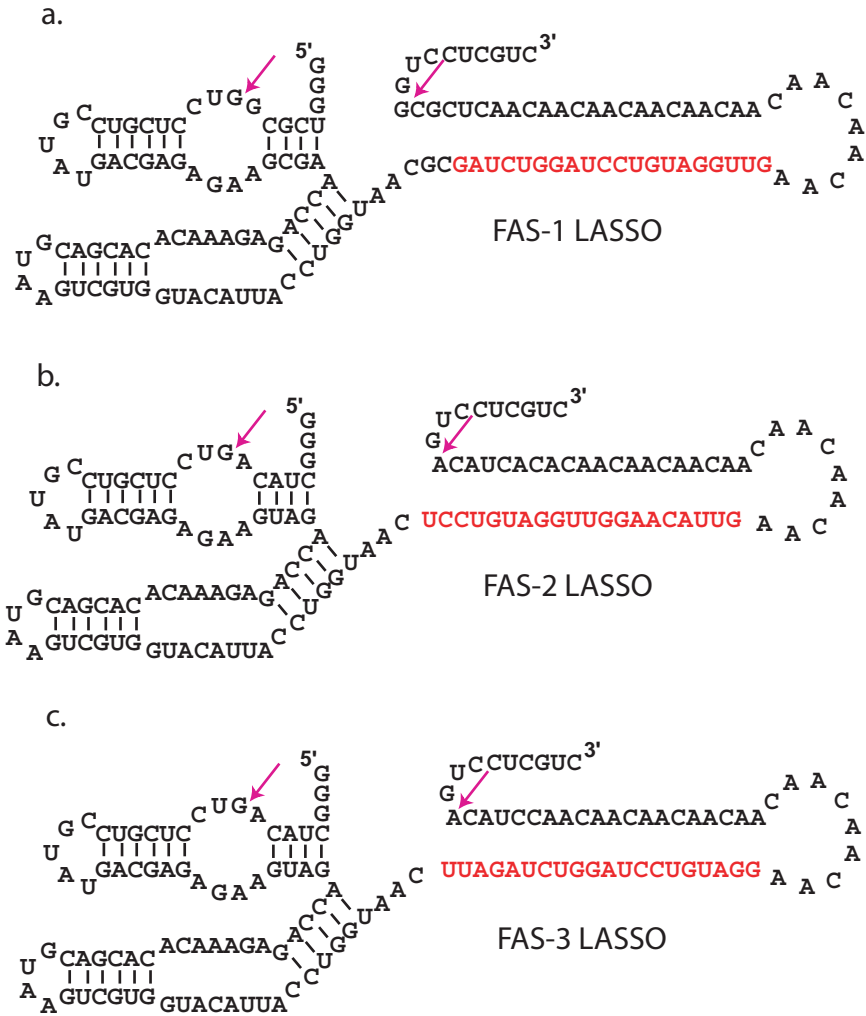

**Supplementary Figure 5.** Sequences and secondary structures of Fas-specific RNA Lassos Fas1 (a), Fas2 (b), and Fas3 (c), which target different sites within the Intron 5/Exon 6 splice junction sequence of Fas pre-mRNA. The structures shown correspond to full-length, unprocessed Lasso transcripts. Cleavage/ligation sites are indicated by arrows. Antisense sequences are in red.
